# Supplementary material for: The Hydrolysis Rate of Paraoxonase-1 Q and R Isoenzymes: An In Silico Study Based on In Vitro Data
Source: MDPI journal article supplement (doi:10.3390/molecules27206780), 2022-10-11
Supplement: s1 [file s1]

# The Hydrolysis Rate of Paraxonase-1 Q vs R Isoenzymes:

## An *in silico* Study Based on *in vitro* Data

### Table of Contents

|                                                                                                                                                                                |                             |
|--------------------------------------------------------------------------------------------------------------------------------------------------------------------------------|-----------------------------|
| <b>Figure S1.</b> Schematic illustration of the enzyme-substrate complex modeling strategy used in this study.....                                                             | <b>Page<br/>S2</b>          |
| <b>Figure S2</b> Schematic illustration of the QSAR modelling steps including descriptor generation, training and test sets created and GA-MLR modelling....                   | <b>Page<br/>S2</b>          |
| <b>Figure S3A–C</b> Substrate-free QPON1 and RPON1 MD results including distances between His115-Ca ion, Gln192/Arg192-Ca ion, Gln192/Arg192 RMSD, and the Backbone RMSD. .... | <b>Page<br/>S3-<br/>S20</b> |
| <b>Figure S4.</b> Y-scrambling test resulting graphs for QPON1 model, eq. 3 (A), and RPON1 model, eq. 4 (B).....                                                               | <b>Page<br/>S20</b>         |
| <b>Figure S5.</b> Density distribution of the descriptors values for each variable in a violin plot for the QPON1 model.....                                                   | <b>Page<br/>S21</b>         |
| <b>Figure S6.</b> Density distribution of the descriptors values for each variable in a violin plot for the RPON1 model.....                                                   | <b>Page<br/>S21</b>         |
| <b>Figure S7.</b> Histogram distribution for QPON1 model based on response variable (rate of reaction).....                                                                    | <b>Page<br/>S22</b>         |
| <b>Figure S8.</b> Histogram distribution for RPON1 model based on response variable (rate of reaction).....                                                                    | <b>Page<br/>S22</b>         |

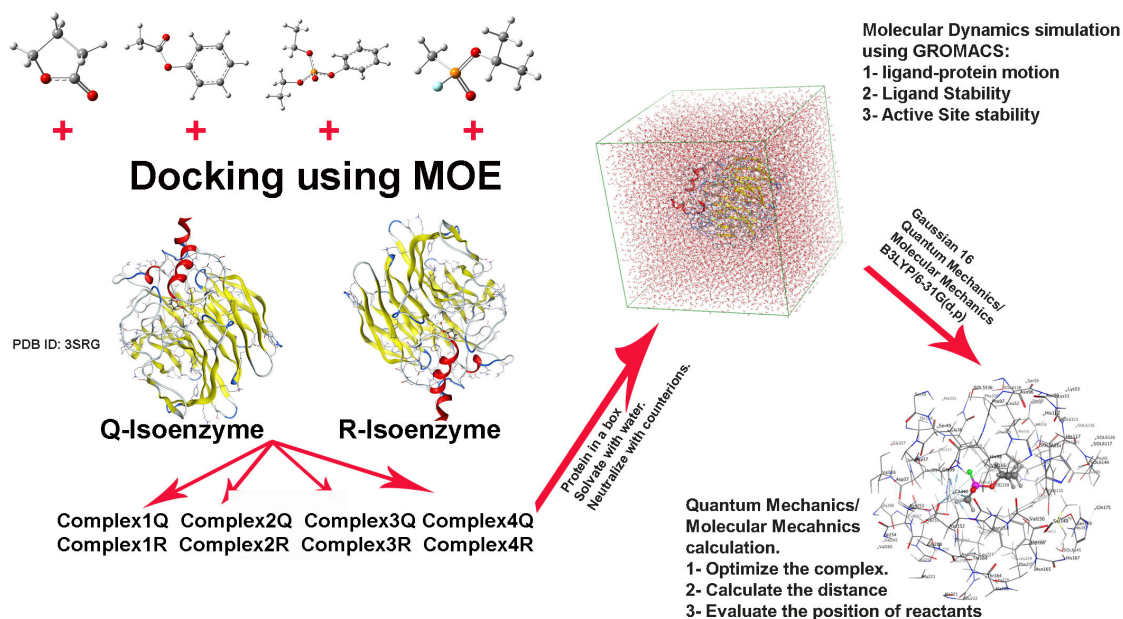

**Figure S1.** Schematic illustration of the enzyme-substrate complex modeling strategy used in this study.

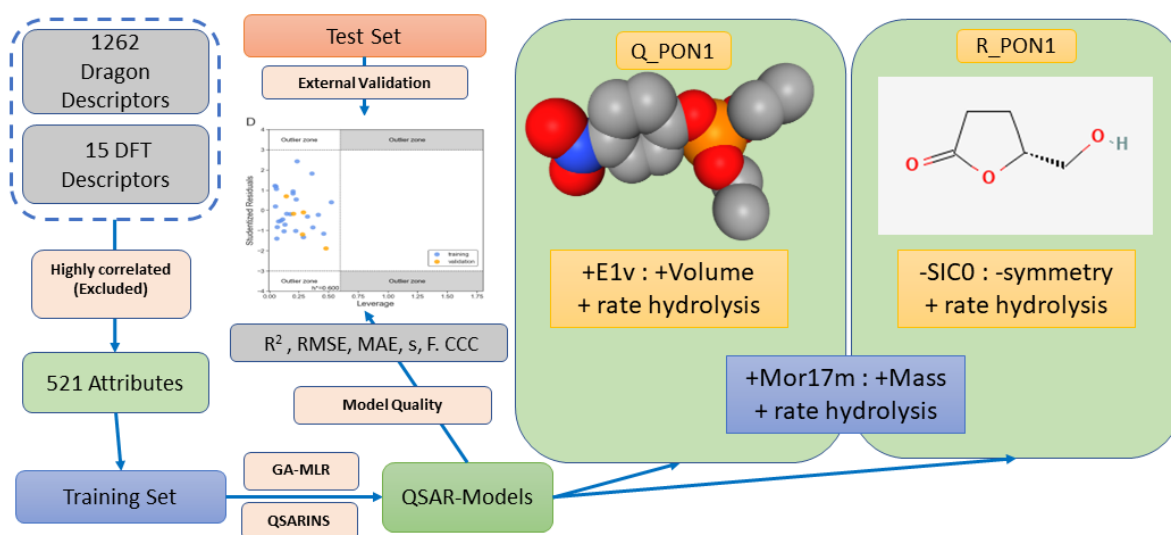

**Figure S2.** Schematic illustration of the QSAR modelling steps including descriptor generation, training and test sets created and GA-MLR modelling.

**Figure S3A.** Backbone RMSD, Gln192/Arg192 RMSD, and Ligands RMSD from MD results of the four complexes,  $\gamma$ -Butyrolactone, Phenylacetate, Paraoxon, Sarine gas, and substrate free complexes, including.

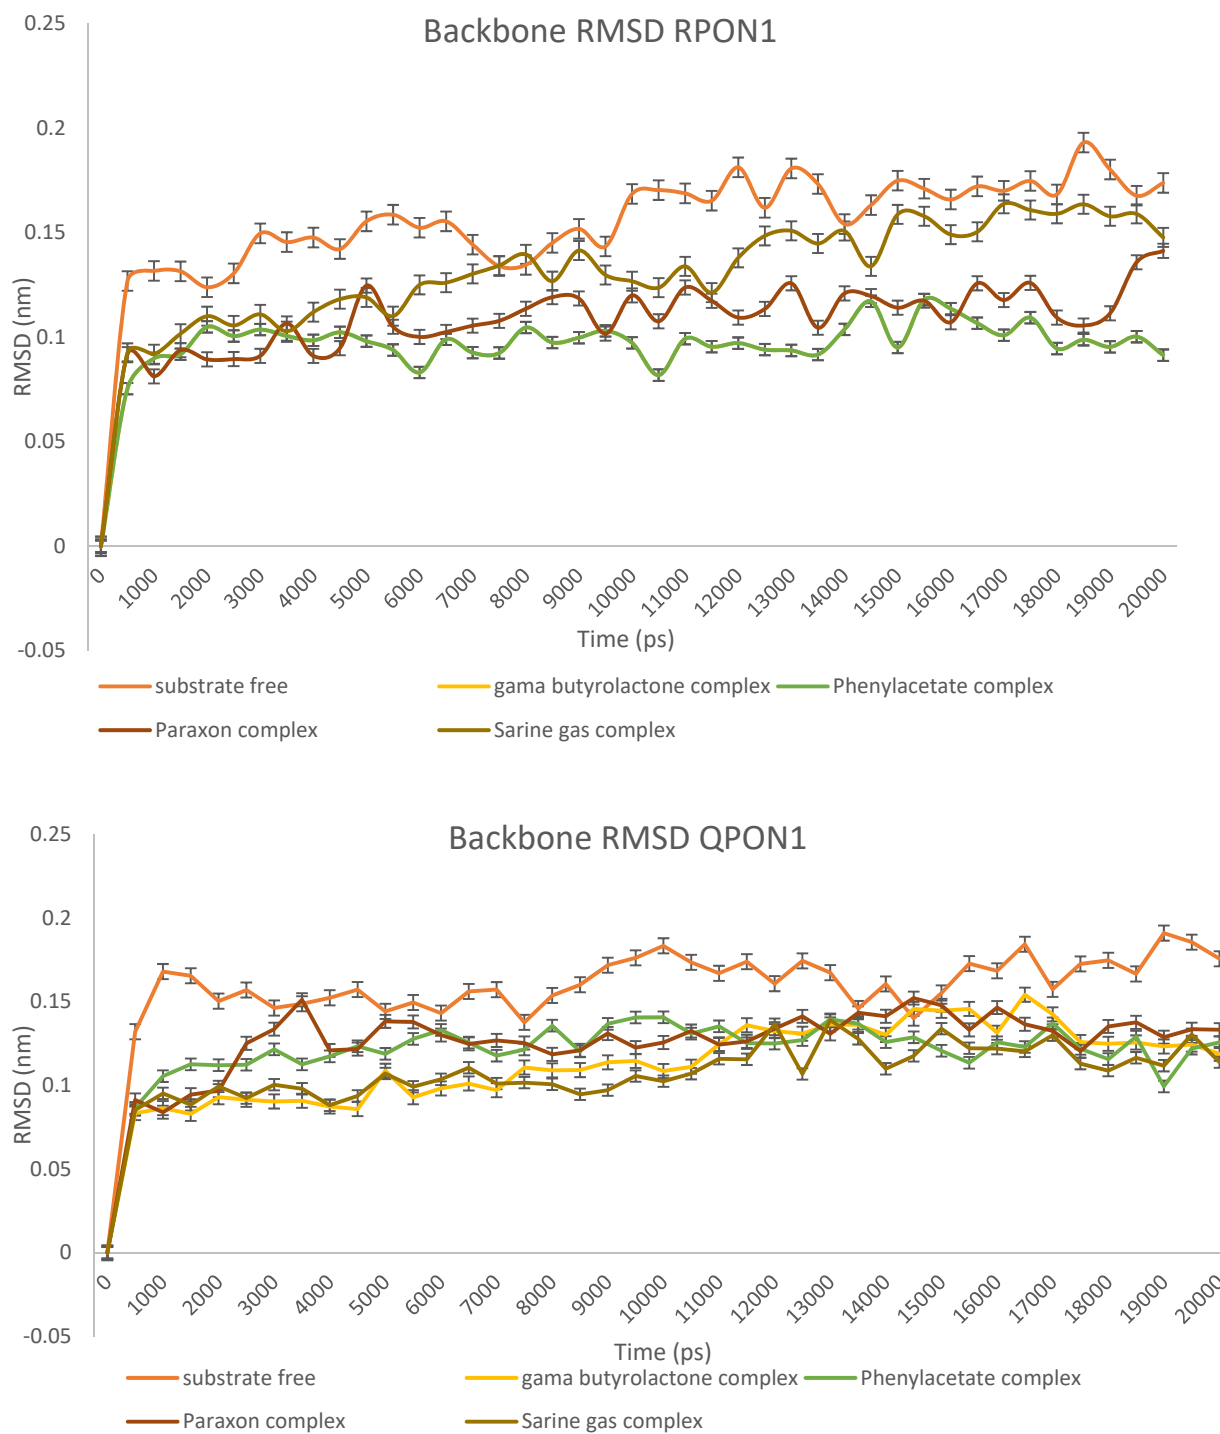

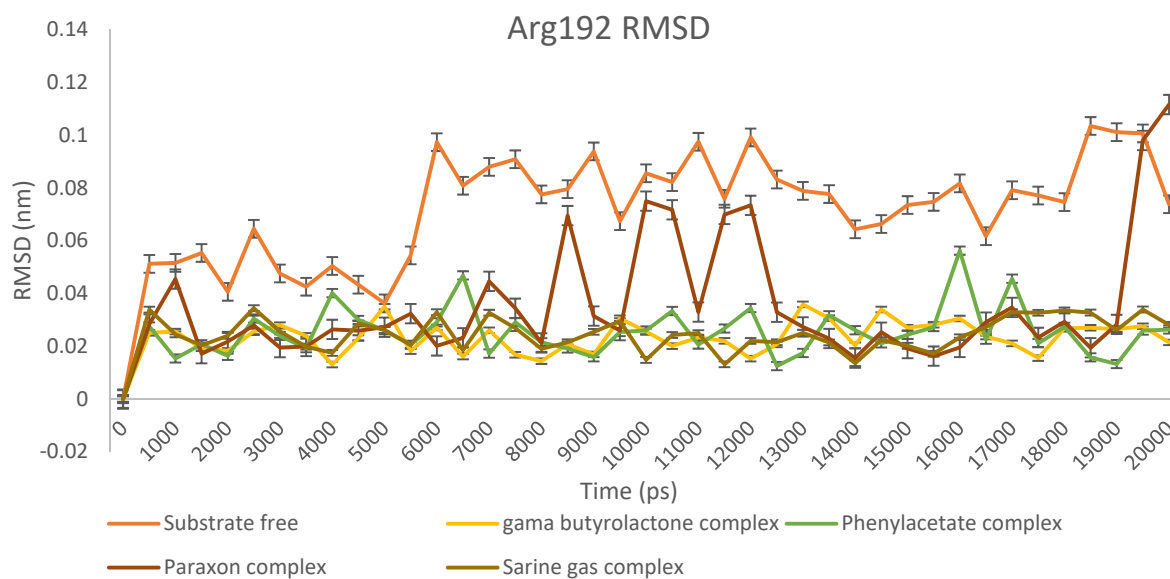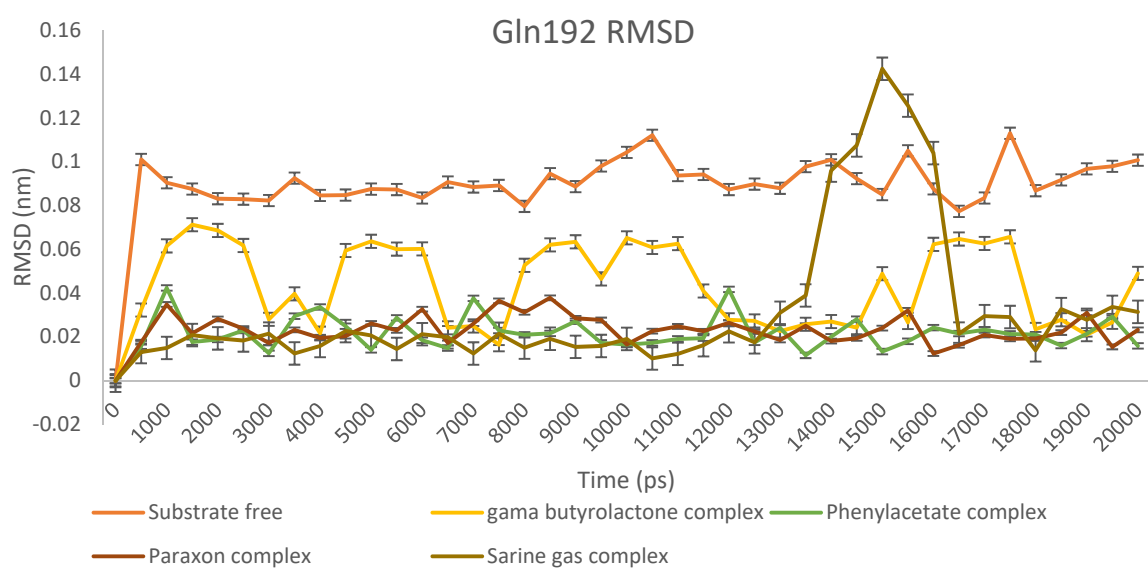

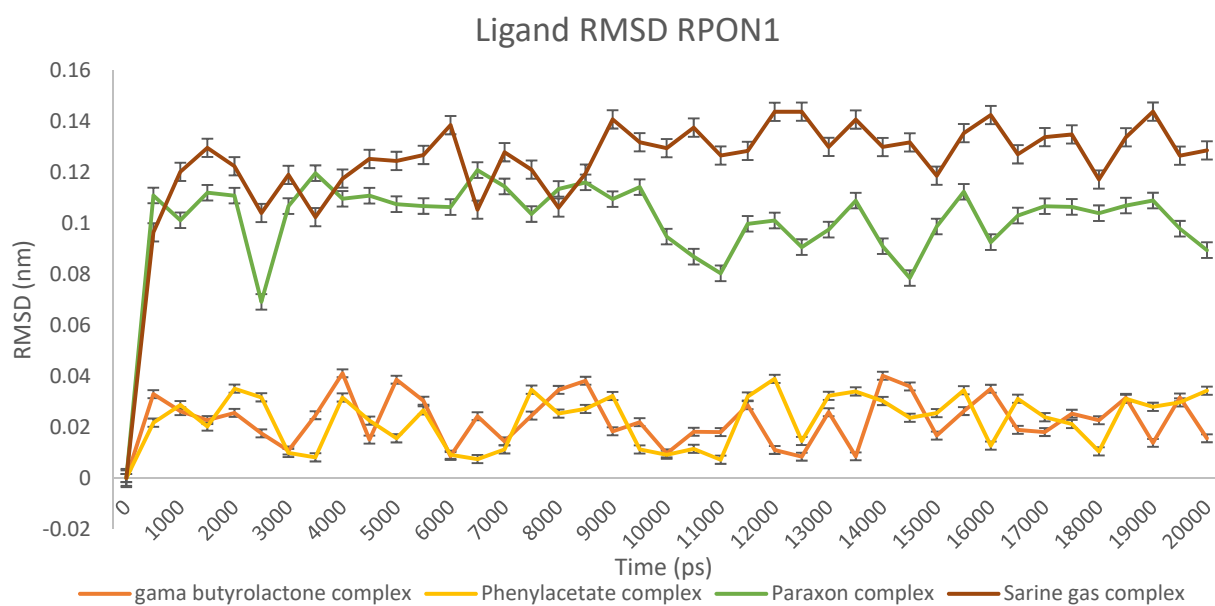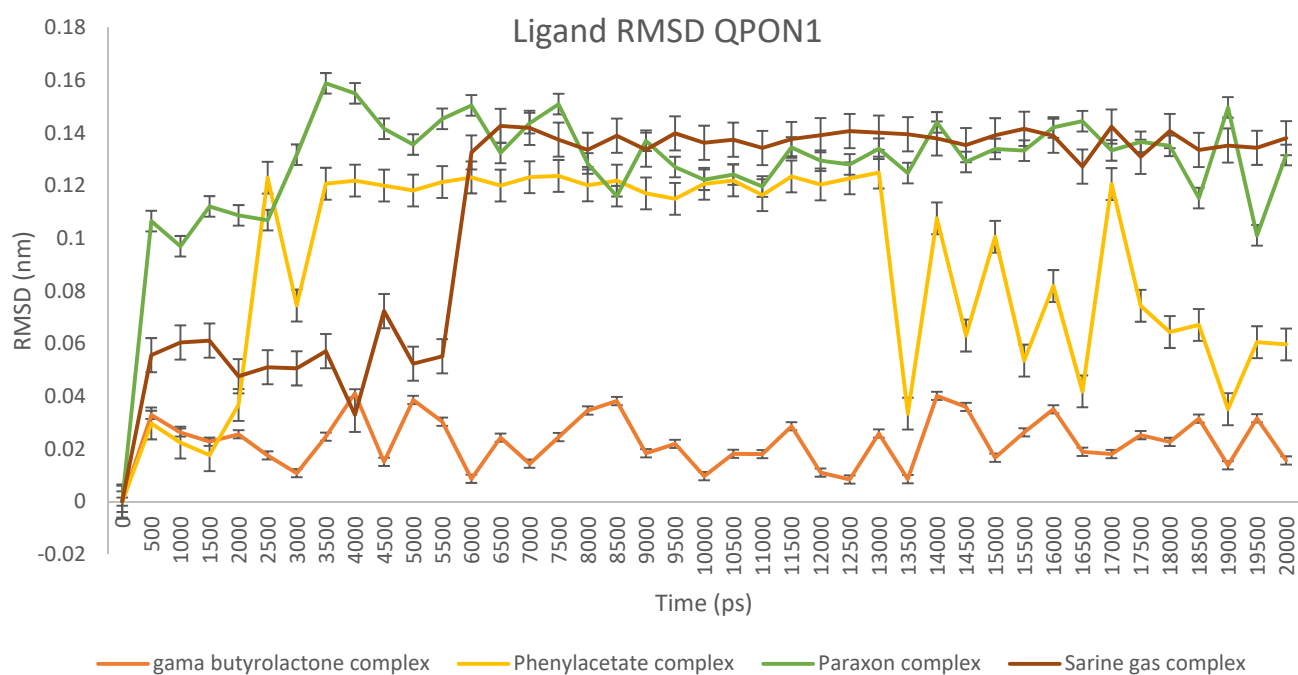

**Figure S3B.** Gln192/Arg192- $\text{Ca}^{2+}$  ion distance from MD results of the four complexes,  $\gamma$ -Butyrolactone, Phenylacetate, Paraoxon, Sarine gas, and substrate free complexes.

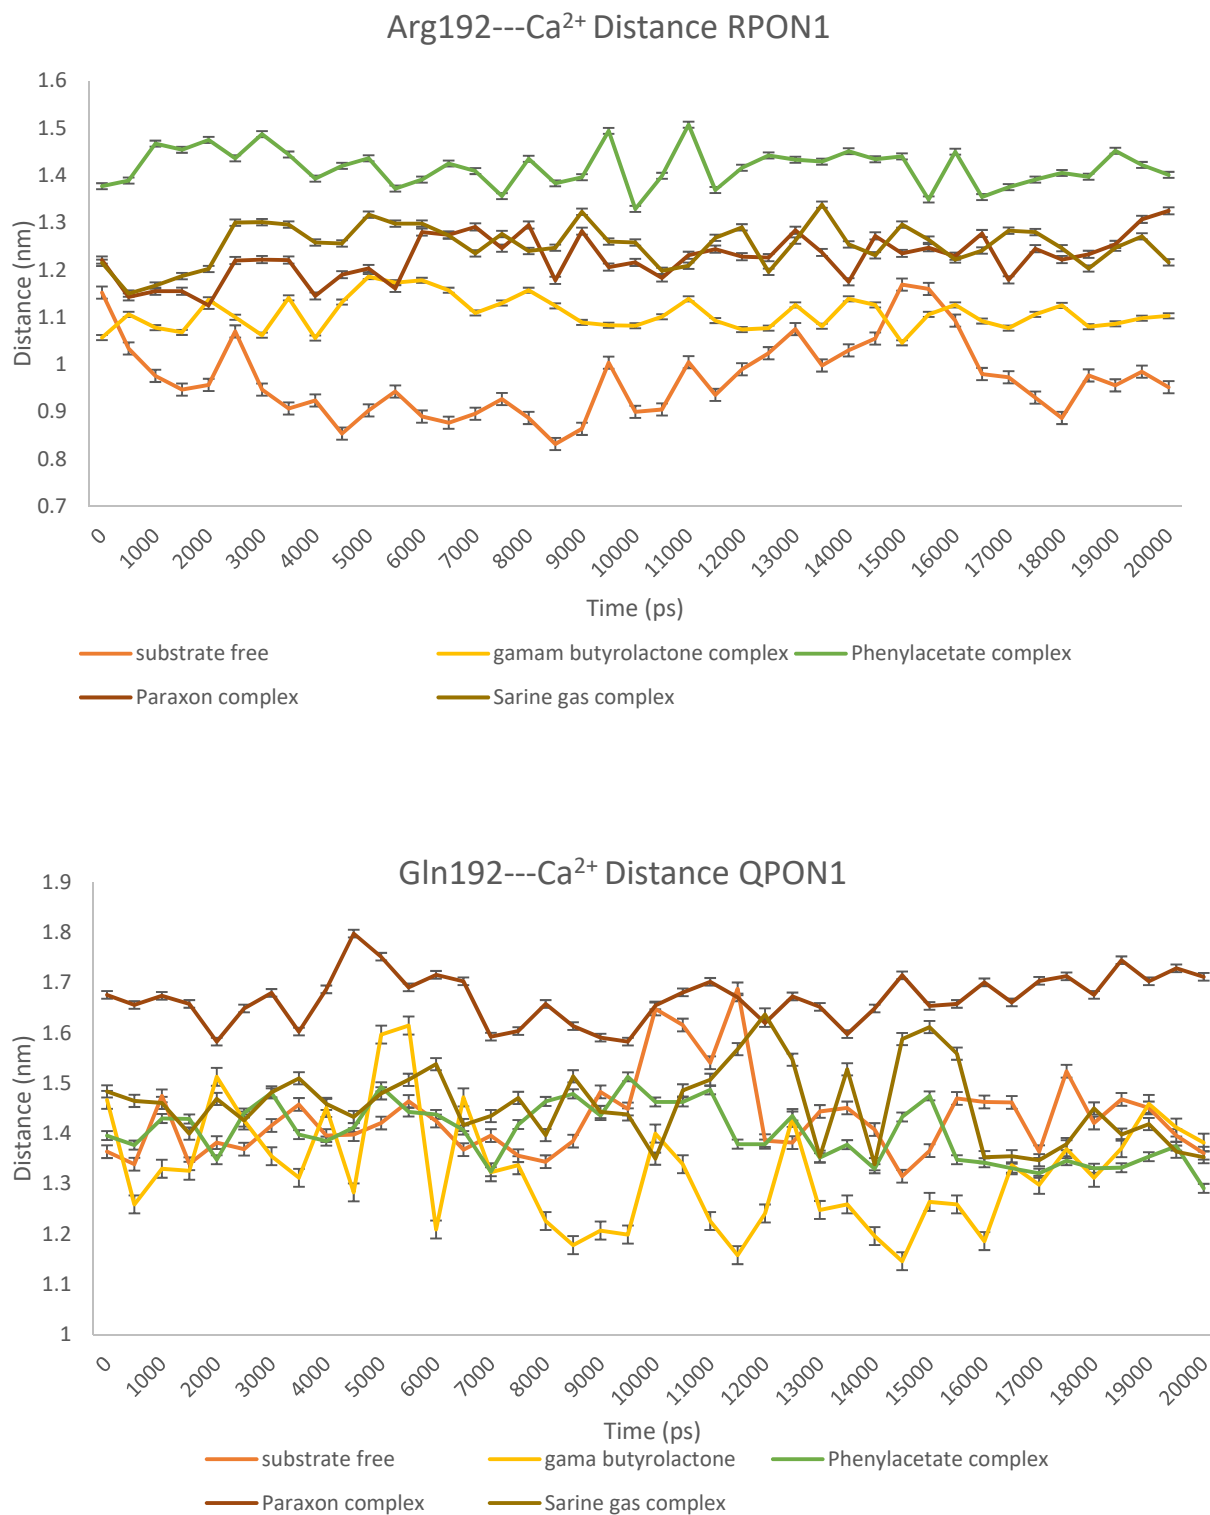

**Figure S3C.** His115-Ca<sup>2+</sup> ion distance from MD results of the four complexes,  $\gamma$ -Butyrolactone, Phenylacetate, Paraoxon, Sarine gas, and substrate free complexes.

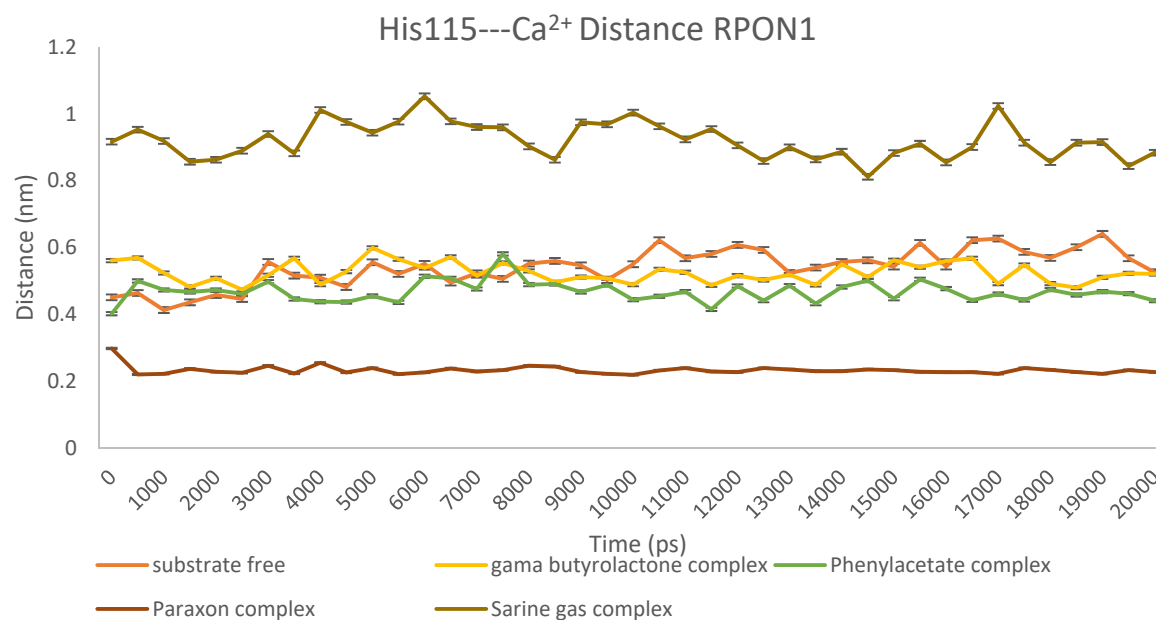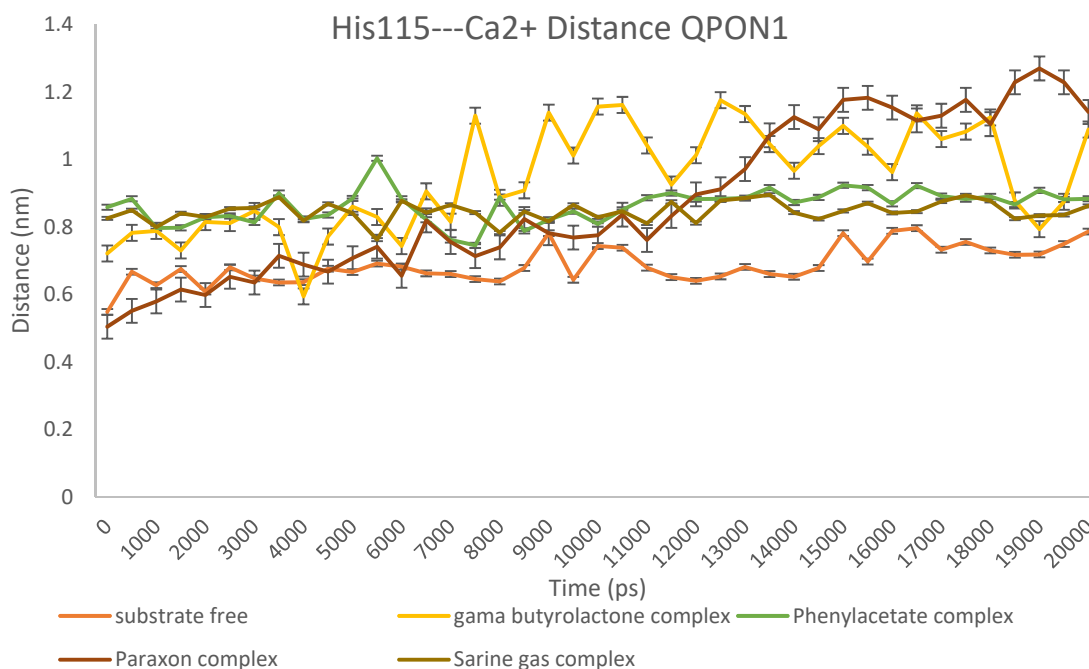

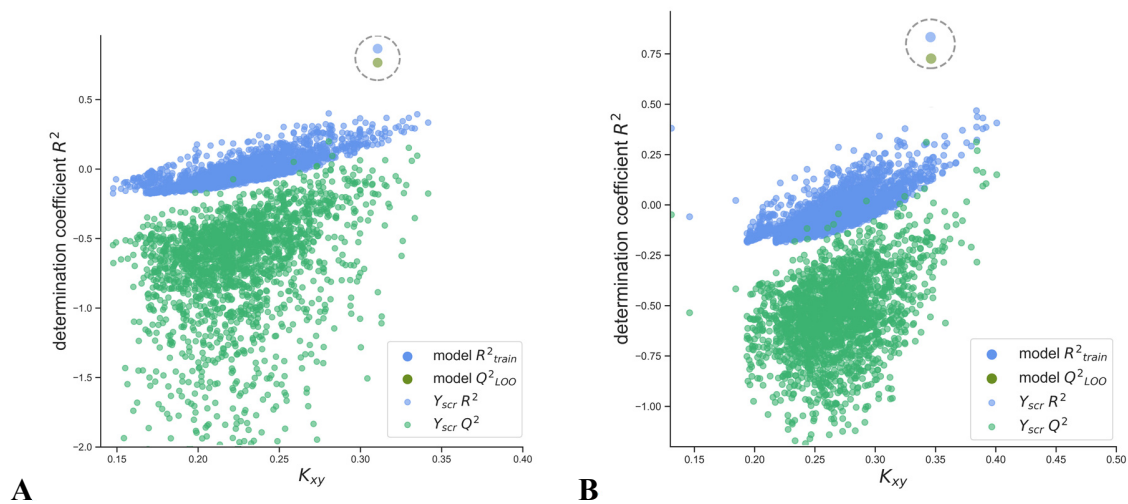

**Figure S4.** Y-scrambling test resulting graphs for QPON1 model, eq. 3 (A), and RPON1 model, eq. 4 (B)

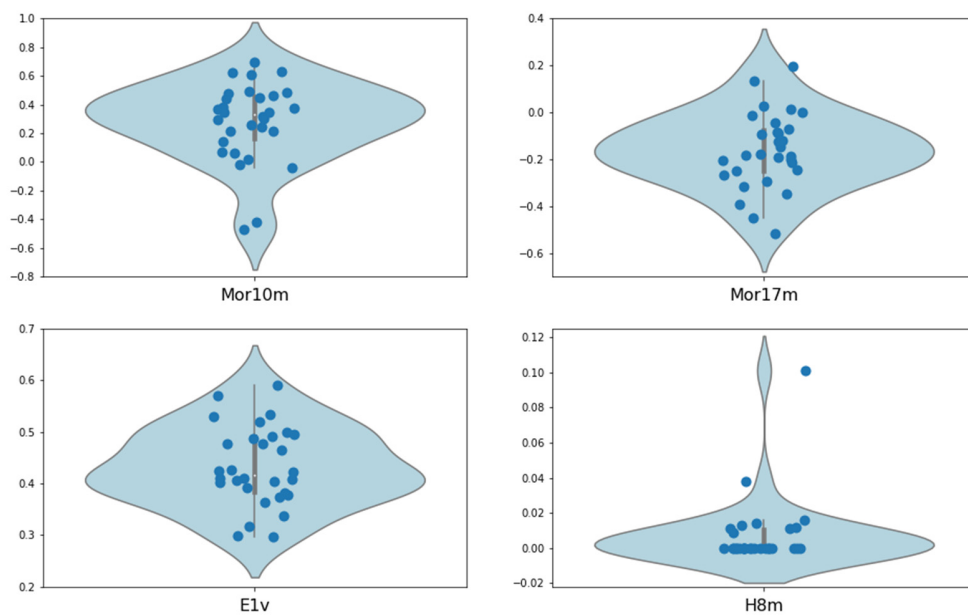

**Figure S5.** Density distribution of the descriptors values for each variable in a violin plot for the QPON1 model.



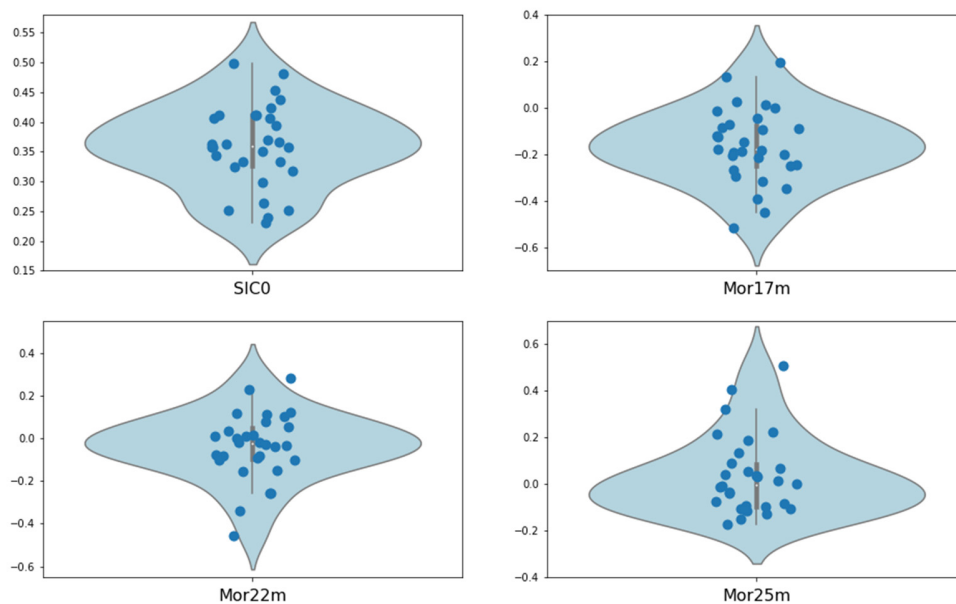

**Figure S6.** Density distribution of the descriptors values for each variable in the RPON1 model (Plot generated using matplotlib and seaborn library of Python).

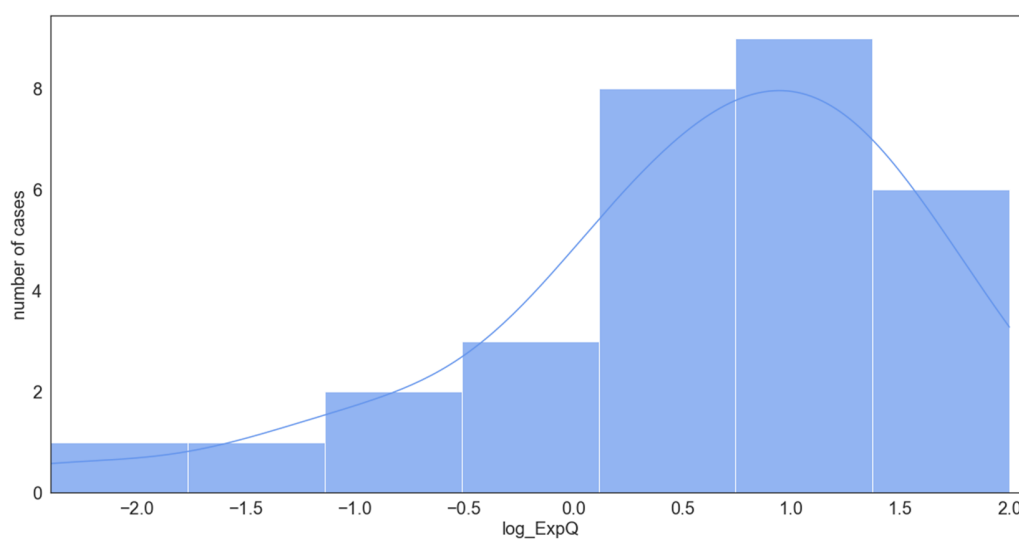

**Figure S7.** Histogram distribution for QPON1 model based on response variable (rate of reaction).

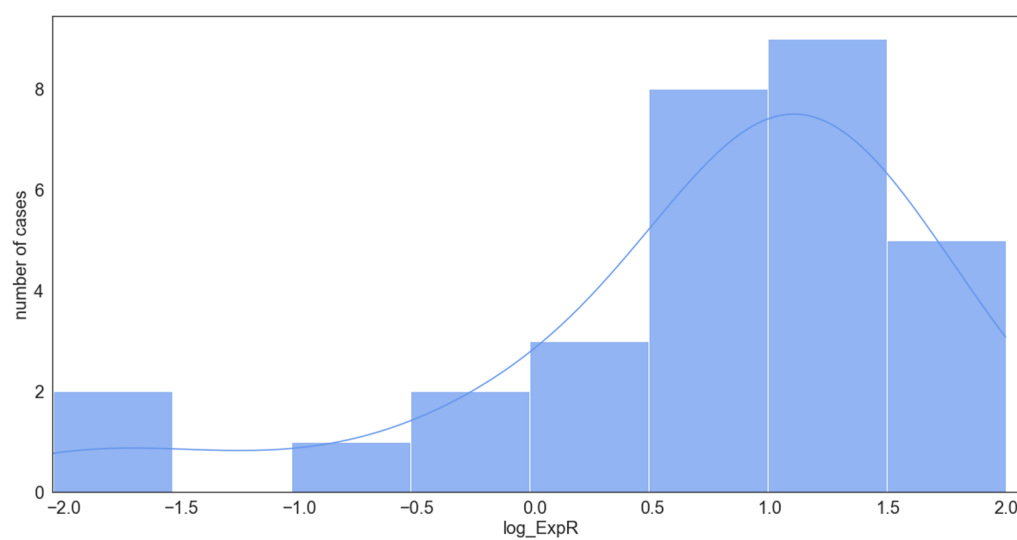

**Figure S8.** Histogram distribution for RPON1 model based on response variable (rate of reaction).
